# Supplementary material for: Disposable Soma Theory and the Evolution of Maternal Effects on Ageing
Source: PubMed Central journal article supplement (PMC4709080; doi:10.1371/journal.pone.0145544), 2016-01-11

# Dispersion newborn juveniles

## Age dependent mortality

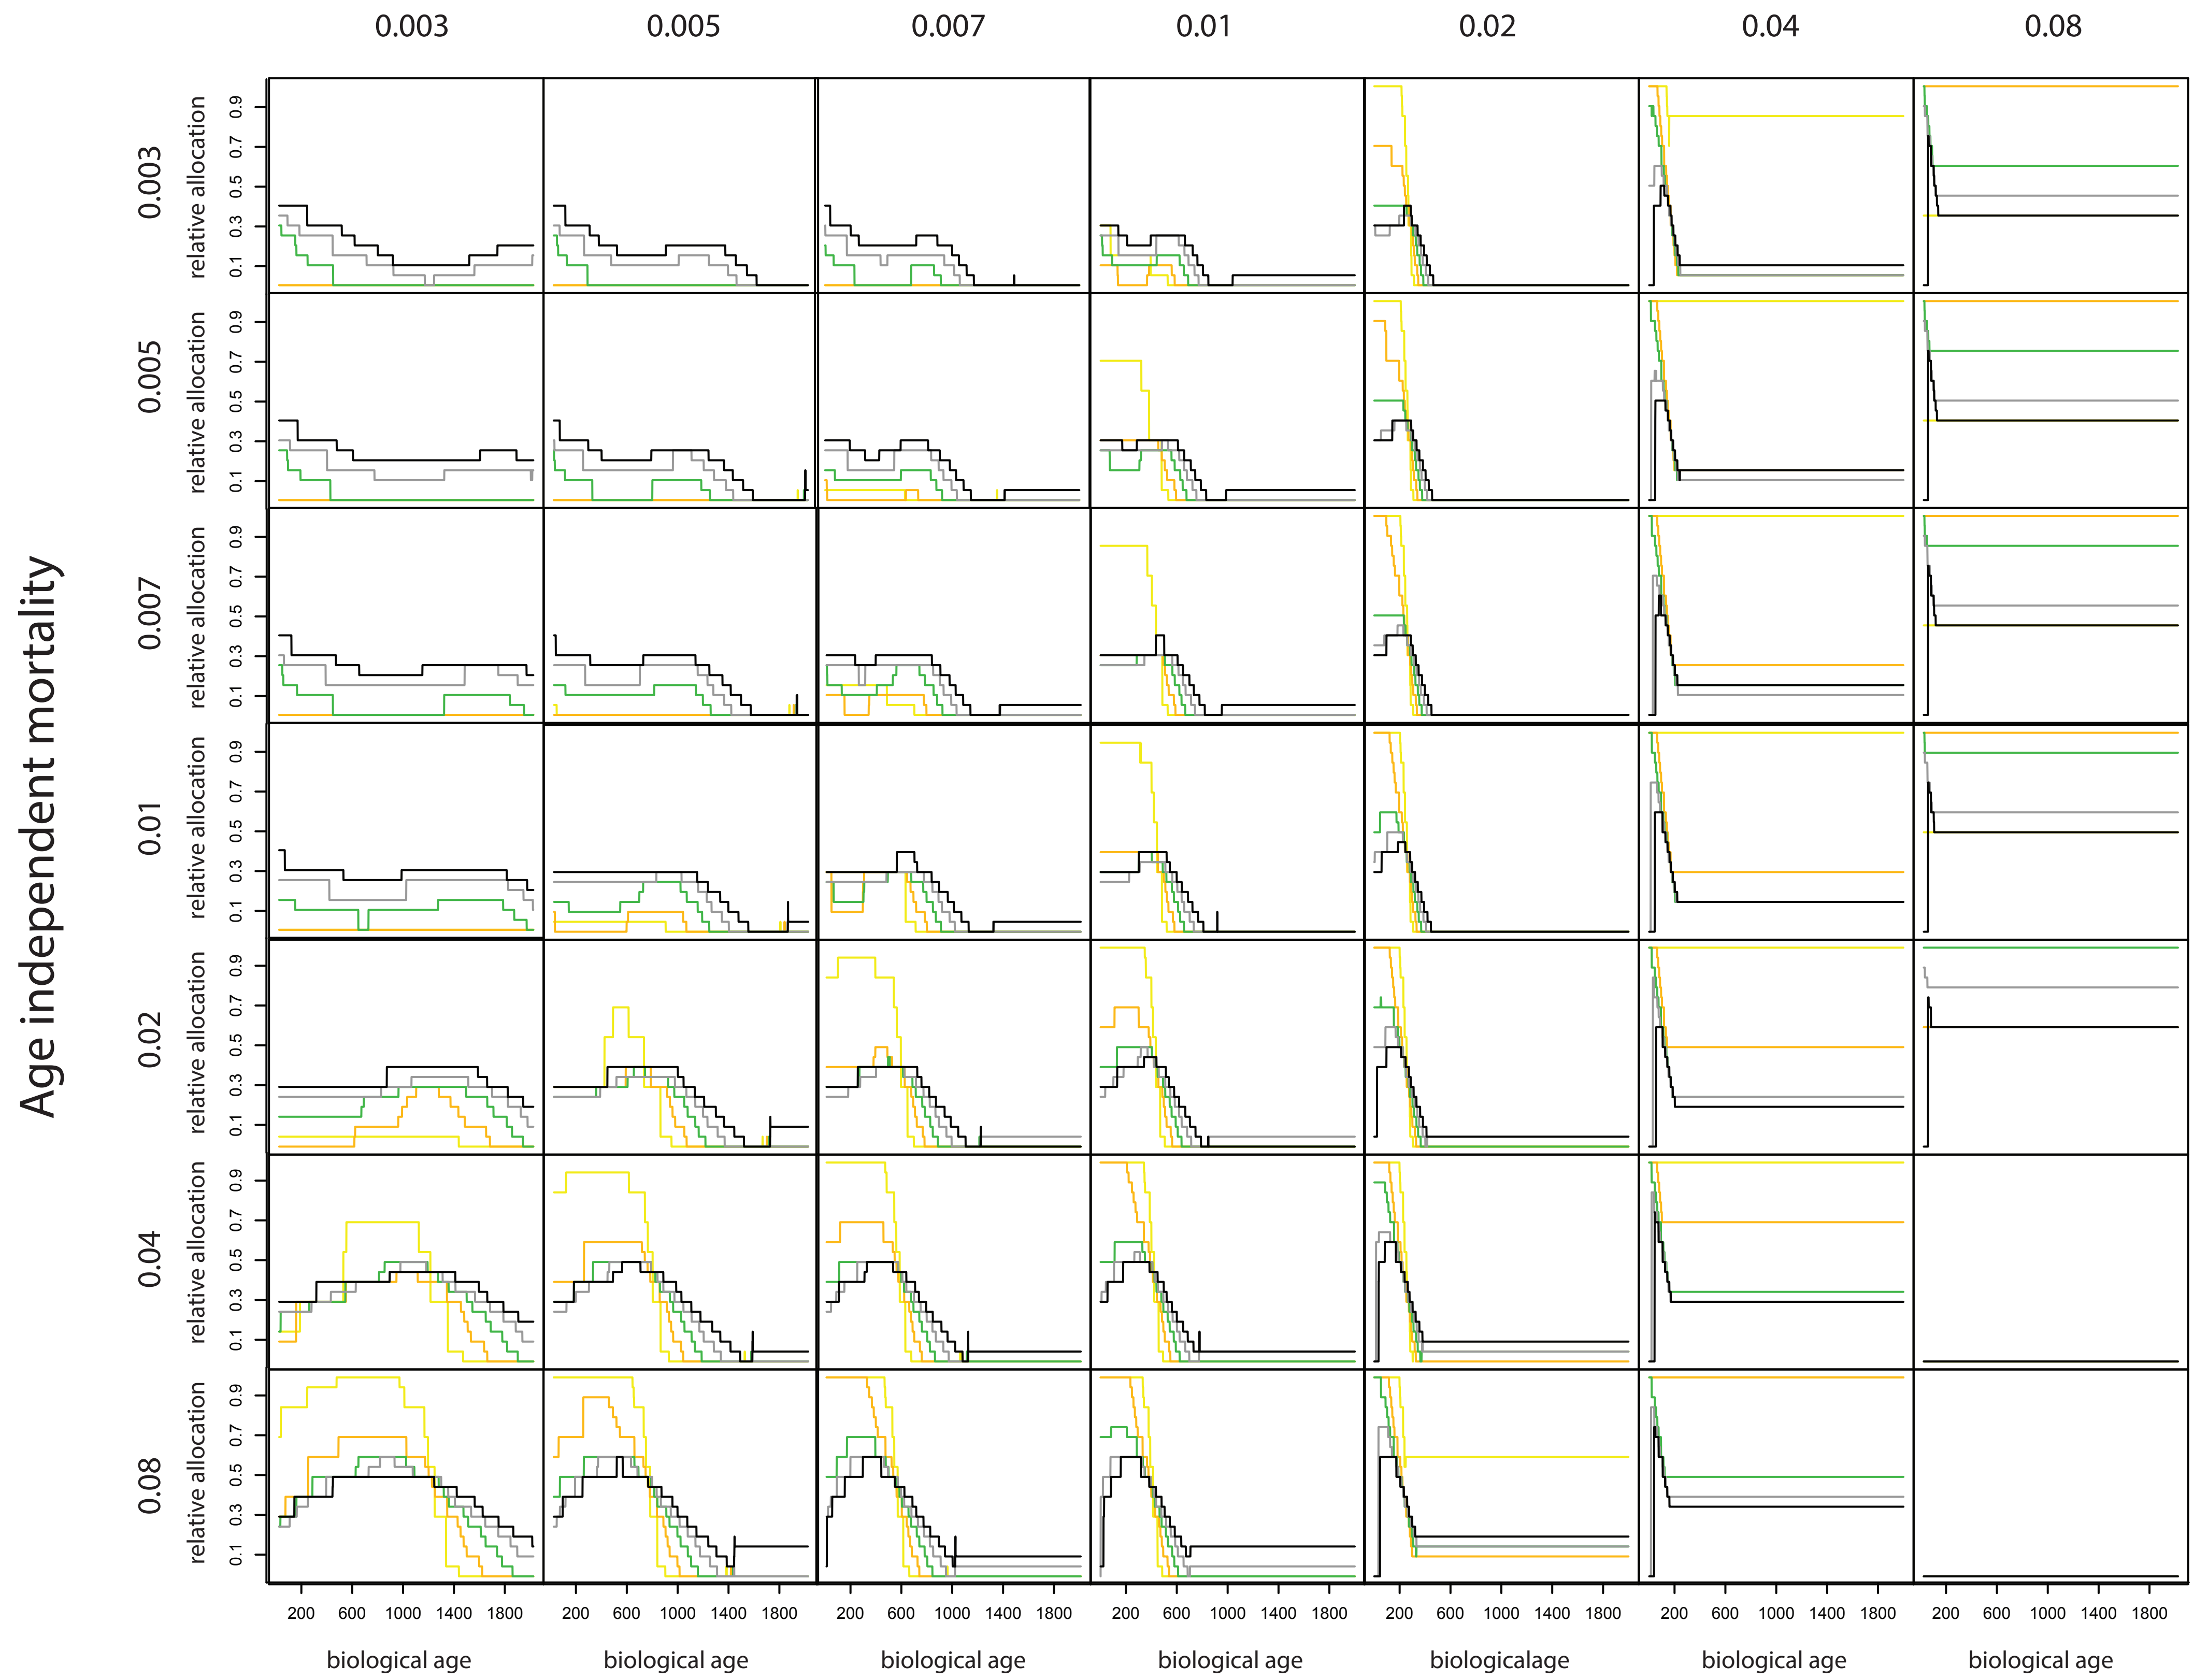

Supplement: pone.0145544.s003.pdf [file pone.0145544.s003.pdf]
